# Supplementary material for: Crowdsourced earthquake early warning
Source: PubMed Central journal article supplement — Sci Adv. 2015 Apr 10;1(3):e1500036. doi: 10.1126/sciadv.1500036 (PMC4640622; doi:10.1126/sciadv.1500036), 2015-04-10
Supplement: 1500036_SM.pdf [file 1500036_SM.pdf]

## Supplementary Materials for **Crowdsourced earthquake early warning**

Sarah E. Minson, Benjamin A. Brooks, Craig L. Glennie, Jessica R. Murray, John O. Langbein,  
Susan E. Owen, Thomas H. Heaton, Robert A. Iannucci, Darren L. Hauser

Published 10 April 2015, *Sci. Adv.* **1**, e1500036 (2015)  
DOI: 10.1126/sciadv.1500036

### **This PDF file includes:**

Text

Fig. S1. Background position noise for various GNSS receivers found on consumer devices.

Fig. S2. Spectra of drift of position time series for various GNSS receivers found on consumer devices.

Fig. S3. Observed time series from consumer accelerometers and GNSS receivers.

Fig. S4. Hayward fault earthquake scenario.

Fig. S5. Epicenter location uncertainty for Hayward fault scenario rupture.

Fig. S6. Tohoku-oki earthquake example.

Fig. S7. Epicenter location uncertainty for Tohoku-oki earthquake.

Table S1. Description of observed GPS earthquake displacement time series shown in Fig. 2B.

Table S2. Number of data used and detection response times for Hayward fault simulation.

Table S3. Locations of GEONET GPS stations used in analysis of Tohoku-oki earthquake.

References (31–34)

# Crowdsourced Earthquake Early Warning

## Supplemental Material

### 1. Operational Early Earthquake Warning

EEW is the subject of active research in many parts of the world. There are few regions, however, where EEW systems are currently operating and sending information to users other than the researchers developing the warning system (Fig. 1). EEW operates throughout Japan and Taiwan. In Mexico, the cities of Mexico City, Oaxaca City, Toluca, Chilpancingo, Acapulco, and Morelia currently receive warnings (Juan Manual Espinosa Aranda, Shri Vishna Singh, Carlos Valdes, personal communication, 2014). Warnings are sent to the Marmara region of Turkey including Istanbul province (Erdik Mustafa, personal communication, 2014). Four nuclear power plants in Switzerland currently receive warnings (John Clinton, personal communication, 2014) as do assorted nuclear facilities, dams, and public and private emergency responders in Romania (Constantin Ionescu, personal communication, 2014). An EEW system has recently begun operating in the Chengdu region of China (Tun Wang, personal communication, 2014.) Finally, while an EEW system is currently in beta testing for most of the west coast of the United States including California, Oregon, and Washington, at present only California has external users of the U.S. EEW system. All of these EEW systems utilize seismic data only, although GNSS data are beginning to be incorporated into the U.S. and Japanese EEW systems (Yusaku Ohta, personal communication, 2014) and the Mexico system will soon use GNSS data as well (Juan Manual Espinosa Aranda, Shri Vishna Singh, Carlos Valdes, personal communication, 2014). Background color in Fig. 1 is peak ground acceleration with 10% probability of exceedance in 50 years given a 475 year return period from the Global Seismic Hazard Assessment Program. Most regions of the world with high seismic hazard have no EEW capabilities (Fig.1).

### 2. Empirical Noise Characterization

We assess a typical smartphone's capability to detect permanent surface displacements by first empirically characterizing positioning noise from a variety of different consumer GNSS receivers (including those found in Google Nexus 5 smartphones, first-generation Apple iPad tablets, u-blox receivers, and Garmin eTrex handheld receivers) as well as Japan's GEONET GNSS receivers. All GNSS data analyzed are coarse acquisition (C/A) code (19). For the time periods most pertinent to EEW application (seconds to tens of seconds), we find that noise character depends both on the device model version and whether it is stationary or moving (Fig. S1-S2). When stationary, epoch-to-epoch repeatability (the ability to recover position at each epoch) for modern devices (e.g., Nexus 5) is ~0.01-0.02 m and for older devices it is less than ~1 m (e.g., iPad) (Fig. S1). When moving at a constant velocity, the Nexus 5 repeatability is ~1.5 m (Fig. S1). This strongly suggests that, when stationary, the Kalman filter onboard the smartphone assumes an essentially constant velocity model – an assumption that would hold for most pedestrian navigation applications where it would be desirable to minimize accelerations due to bodily motion or device manipulation.

The repeatability for all of these devices depends upon the time-span of the measurements because they all have background noise that exhibits temporal correlations (i.e., the noise spectra are “red”). Consequently, the time series of position estimates exhibit drift that we assess following (31) (Fig. S2). At intervals of a few seconds, the raw C/A code positions can resolve displacements of 10 cm; but for longer intervals (e.g., 60 seconds), their sensitivity decreases to 2-3 m. (Note that there is less drift in positions estimated from C/A code data recorded at GEONET GPS stations than from C/A code data recorded on a consumer receiver. This is because scientific GPS stations have higher quality hardware. The most significant difference is probably the reduction in multipathing made possible by

the choke ring antennas at scientific GPS sites.) Satellite Based Augmentation System (SBAS) corrections or phase smoothing significantly improves the precision of the consumer devices by a factor of 10 or more.

### 3. Offset Tests

As discussed in the main text, we subjected the platform to a series of displacements ranging from ~0.1-2.0 m (Fig. 2, S3) and find that the raw C/A positions (with SBAS) faithfully records the entire displacement range. In contrast, the smartphone is essentially insensitive to the displacements because its onboard data processing uses a Kalman filter that removes most of the external motion to which the device was subjected.

To assess the full potential of consumer grade GNSS and INS devices for earthquake monitoring, we constructed our own extended Kalman filter using raw C/A code data from the u-blox receiver and accelerometer data from the Nexus 5. The Kalman filter uses a constant jerk state space model for system dynamics (21). Given GNSS positions and three-component accelerometer observations, the filter simultaneously estimates displacement and accelerometer bias. Fig. 2A in the main text shows the results of a 50 cm offset test and demonstrates that the Kalman filtered solution could accurately recover the displacement time history to which the receiver was subjected even though the twice-integrated (yielding displacement) accelerometer record demonstrates a large amount of drift over earthquake time-scales.

### 4. Earthquake Monitoring Capabilities of Consumer Devices

Fig. 2B compares the empirical drifts we estimated for a variety of instruments (Fig. S2) with observed displacement time series for recent notable damaging earthquakes (Table S1) (22, 23, 25). The strong motion accelerometer drift was estimated by differencing a twice-integrated observation of the 2011 Tohoku-oki earthquake recorded on the east component of K-net strong motion station MYG011 and a corresponding displacement time series from nearby GEONET GPS station 0550. The consumer accelerometer drifts were obtained by averaging at 62,225 observation locations the absolute value of the difference between ground motion time series from the  $M_w$  7 Hayward fault scenario and twice-integrated corresponding simulated acceleration time series using noise from a Nexus 5 smartphone's onboard accelerometer. Similarly, the Kalman filter drift time series were obtained by averaging at those same observation locations the absolute value of the difference between the ground motion time series and corresponding simulated Kalman filter time series computed by combining the same acceleration records with simulated C/A code GNSS time series in the same manner as Section 4. These simulated time series were originally 90 sec duration and then extrapolated from 90 sec to 100 sec. Both the simulated and empirical noise time series were smoothed for plotting purposes. Note that noise characteristics for data involving accelerometer observations are very sensitive to the type of motion to which the instrument was subjected. This can be clearly seen for the Kalman filter drift curve which was calculated for an  $M_w$  7 earthquake. Once the ground shaking ceases, the Kalman filter acts to damp further drift of the estimated displacement.

Figure 2C shows the minimum magnitude observable (as a function of distance) with a signal-to-noise ratio (SNR) of at least 10 for the devices in Fig. 2B. The SNR for displacement observations was computed by assuming that the signal is the peak ground displacement (PGD) as a function of magnitude and distance (27), which we assume occurs at approximately the S-wave arrival time. Thus the noise is the amount of drift that accumulates between the P-wave arrival and S-wave arrival assuming wave speeds of 6 km/s and 3.5 km/s, respectively, where the drift accumulation follows the

curves shown in Fig. 2B. The SNR curve for the acceleration observed by a consumer accelerometer was computed by assuming the amplitude of the signal was given by the peak ground acceleration (PGA) (27), and that the noise over short time durations was Gaussian with an amplitude of  $0.031 \text{ m/s}^2$  based on the noise characteristics we observed over short time periods for the accelerometer in a Nexus 5 smartphone. As in Fig. 2B, the curves in Fig. 2C were smoothed for plotting purposes.

## 5. Hayward Fault Rupture Simulation

We simulated a crowdsourced EEW response to a scenario magnitude 7 earthquake on California's Hayward fault using two different types of data. In the main text (Fig. 3), we presented results from assuming that different fractions of the population contributed data from consumer devices containing both an accelerometer and a simple GNSS C/A code receiver equipped with neither SBAS differential corrections nor phase-smoothed L1 data. (Almost all smartphones record acceleration and C/A code data.) We then Kalman filtered the twice-integrated acceleration time series and GNSS position time series, and modeled the resulting displacement estimates. In Fig. S4, we show the results from assuming different fractions of the population contributed data from consumer devices with SBAS-enabled GNSS receivers with phase smoothing but no accelerometer. (This is the highest quality type of GNSS receiver commonly found in consumer devices.) The results in Fig. 3 and Fig. S4 are nearly identical. Both types of positioning data yield earthquake detection in 5 seconds (assuming 0.2% of the population submits usable data), earthquake locations with errors  $<5 \text{ km}$  and very accurate moment magnitude estimates at all times for all levels of participation.

### Data Generation

The uncertainties of GNSS vertical positions are typically much worse (at least a factor of two) than horizontal positions (19). Accordingly, all of the modeling in this paper was accomplished using only the 2-D horizontal displacements calculated from the east and north position time series.

To simulate the horizontal displacements we would obtain from consumer devices located near the rupture of a moderate magnitude earthquake, we began with the predicted horizontal ground motion time series for the  $M_w$  7 Hayward fault scenario rupture called `hs+hn_n04_hypoO_vr92_tr15` (32). Smartphone GNSS (raw C/A code) and acceleration records were then simulated by adding to these time series the empirical noise spectra of displacements obtained from a stationary raw C/A code GNSS receiver (Garmin eTrex) (31) and the accelerometer on a Nexus 5 smartphone. We then applied a Kalman filter to combine the resulting C/A code and twice-integrated acceleration time series. The choice of the Garmin eTrex is a conservative one as it is the noisiest of all the devices (Fig. S1-S2). We also simulated consumer GNSS data with real-time corrections by adding to the original synthetic displacement time series the noise characteristics we had determined empirically for the stationary u-blox receiver with SBAS and phase smoothing. These two simulated datasets allow us to explore the results obtainable from two hardware configurations we are likely to encounter in a crowdsourced earthquake monitoring system: one that provides GNSS and accelerometer data without SBAS or phase smoothing, and one that provides GNSS data with differential corrections from SBAS.

In the Kalman filter case, we computed east and north component displacement time series with a one second sampling rate from independent Kalman filters using a constant jerk state space model for system dynamics (21). Given a position time series and an accelerometer time series, the filter simultaneously estimates displacement and the bias for the accelerometer measurements. This is a dynamic model that accounts for the changes in position, velocity, and acceleration that these devices

will be subjected to during an earthquake. Simulated earthquake displacements only give three degrees of freedom ( $x$ ,  $y$ , and  $z$  displacement). For a full inertial system simulation 6 degrees of freedom (3 displacements and 3 rotations) are required. We made the simplifying assumption that the sensitive axes of the accelerometer triad were always aligned with the simulated motion directions of the earthquake. With this assumption, because the accelerometers are mutually orthogonal (as are the simulated displacements), we can treat the  $x$ ,  $y$ , and  $z$  displacements separately as three 1-D estimation problems.

Observation locations were chosen to mimic the distribution of data we might obtain if a certain percentage of the population participated in crowdsourced earthquake monitoring. Our approach was to choose a random distribution of land-based observing locations within a 35 km-by-100 km rectangular box centered on the Hayward fault with the number of observations equal to a percentage of the population within that box (Fig. 3, S4). Since only a small fraction of the population might choose to participate in a crowdsourced EEW system and only a small fraction of those participants may be contributing usable data at any given time, we purposefully chose to consider cases where a very small percentage of the population reported observations of the earthquake. Specifically, we considered the cases where we obtained data from 0.0125%, 0.025%, 0.05%, 0.1%, and 0.2% of the population in the 35 km-by-100 km region. These cases correspond to 294, 587, 1174, 2348, and 4696 observations, respectively (Table S2).

### Earthquake Detection

At each second, we counted the number of observing devices that detected a trigger where we determined that a device had been triggered if it and the four devices nearest to it each have accumulated a horizontal displacement in excess of 5 cm. This criterion requires that the displacement signal be spatially coherent as we expect earthquake displacements to be. We then declare that an earthquake has been detected when at least 100 observers simultaneously report triggers. This criterion is reached in less time with increasing numbers of observations simply because, with a denser set of observations, the seismic waves do not have to travel as far to reach 100 observers (Table S2).

### Locating the Epicenter

At each second after detection, we obtain an earthquake epicenter by fitting a power law to the amplitudes of the horizontal offsets reported by all triggered observers and searching for the source location that minimizes the L1 norm of the residuals (Fig. S5). This estimation is not computationally expensive and so the time required to obtain an epicenter depends on the time required for the displacements to propagate from the earthquake rupture to the receivers. Our errors in the epicenter location are always less than 5 km (Figs. 3, S4).

Note that we use a power law regression of unknown power:  $\log A = c_0 + c_1 \log r$ , where  $A$  is the amplitude of the observed horizontal displacement,  $r$  is the distance between the observer and the proposed epicenter, and  $c_0$  and  $c_1$  are the unknown linear regression parameters. Alternatively, we might have fixed  $c_1 = -2$  because surface offsets exhibit an  $r$ -square decay in the far-field (5). However, we are using near-field observations for which the  $r$ -square decay does not necessarily hold. Therefore, we solve for the power of the decay in the linear regression.

### Determining Earthquake Magnitude

We determine the magnitude at each second by first calculating a finite fault slip model and then computing the moment magnitude associated with that slip model. The finite fault slip models are computed using the Bayesian linear regression approach of (25). In that paper, the authors solved for the fault geometry and distributed slip model simultaneously using three-component real-time GPS data. However, here we only have the two horizontal components of motion. Our initial tests indicated that, without the vertical component of deformation, we could not constrain the fault orientation. Instead, we used the accurate epicenter locations obtained to justify assuming that the rupture was located on the Hayward fault, and then assumed a planar fault whose strike and dip represented the average strike and dip of the Hayward fault in the region of the epicenter (strike  $325.0000^\circ$ , dip  $76.2309^\circ$ ). (For global application, existing maps of the largest faults would need to be employed.) We sub-divided the fault plane into one row of patches in the down-dip direction and eight patches in the along-strike direction, each patch having a length of 10 km on a side. Our Green's functions were computed for rectangular dislocations in a homogeneous elastic half-space. The moment magnitudes derived from the results of our slip inversion at each second show high accuracy and low latency (relative to the scenario earthquake's actual moment release as a function of time) for all data sets tested (Figs. 3, S4).

## 6. Tohoku-oki Earthquake Model

### Data

As part of routine collection of dual frequency, scientific-grade GPS carrier phase data, the GEONET GNSS stations also record the same pseudorange data that are used for positioning in consumer devices (19). To simulate real-time positioning using single frequency data on a consumer device, we estimated positions based only on C/A code pseudorange values on the L1 frequency ("C1" observations) from a selection of GEONET GPS stations (Table S3) using the pr2p (pseudorange to position) algorithm developed by Dr. Mark Miller at JPL as part of the GIPSY-OASIS software package (33) (Fig. S6). The algorithm calculates the position and receiver clock bias at each epoch by minimizing a penalty function, the RMS of residuals, for that epoch. An outlier detection algorithm is triggered when the penalty function or individual residuals do not satisfy solution tolerance criteria. The residual threshold for individual pseudorange observations was 40 m, and the RMS pseudorange threshold was 20 m. Once outliers are identified and deleted, the penalty function is minimized again. Broadcast satellite orbits and satellite clock corrections were used. There are no troposphere or ionosphere models applied. The estimation uses the prior epoch's position and receiver clock bias as an initial value for the next epoch's position and clock bias value, but there is no temporal smoothing between position estimates.

Fig. S6 compares the displacement time series from the pr2p processing of the GEONET data for the Tohoku time series to displacement time series obtained through scientific-quality processing that takes advantage of the dual-frequency data these scientific GPS stations collect. At displacements less than 0.5 m, the comparison is degraded by a subset of far-field stations that experienced a spatially confined ionospheric disturbance combined with loss of satellite lock. However, at the vast majority of stations, the offsets estimated from the C/A code and post-processed scientific-grade time series are nearly equal (Fig. S6C).

### Earthquake Detection

We use the same method for detecting the Tohoku-oki earthquake as we did for the Hayward fault simulation. However, because the estimated GPS positions include ionospheric noise and spurious jumps due to loss of satellite lock, we increase the minimum horizontal displacement required for

triggering to 75 cm. Further, rather than declaring that an earthquake has been detected when a certain number of triggers have been received, we instead say that we have detected an earthquake when the number of triggers exceeds  $5\sigma$  relative to the triggering rate during the pre-event period. This accounts for the fact that, at any given time, some subset of GPS stations exhibit spurious displacements. This threshold is reached at 77 sec after the origin time.

### Locating the Epicenter

We used the same approach to calculate the earthquake epicenter as we used for the Hayward fault simulation (Fig. S7).

### Determining Earthquake Magnitude

At each second, we estimated the total magnitude release for the Tohoku-oki earthquake by estimating a finite fault slip model and calculating the moment magnitude associated with that slip model. We used the same inversion methodology to invert for the slip distribution as we did for the Hayward fault simulation combined with the 1-D layered elastic structure and 3-D curved fault geometry of (34). The resulting magnitude release as a function of time closely matches the source-time function obtained by a full kinematic inversion of the Tohoku-oki earthquake rupture using scientific-grade kinematic GPS, static GPS offsets, seafloor geodesy, and both near-field and far-field tsunami data (24).

### Tsunami Arrival Times

The tsunami arrival times in Fig. 4 were estimated from the time of the first increase in sea level recorded by the ocean-bottom pressure gauges, GPS wave gauges, and coastal tide and wave gauges included in (28).

## **7. Determining Pre-Earthquake Position**

Detecting, locating, and modeling the slip distribution of an earthquake requires estimating the observed offset at each second of time relative to the sensor's position prior to the beginning of the coseismic deformation. Note that the later the time of the prior position, the less long-period drift may accumulate between the prior position and the sensor's position during the earthquake. In fact, this prior position need not be from a time before the origin time of the earthquake, only before the first displacement at the sensor's location.

We leave for a future study determining the best way to identify the pre-earthquake position. In this paper, we presented results for earthquake detection from two end-member cases. For the Tohoku-oki earthquake, we used a pre-event position that was estimated from one minute of data observed 1,000 seconds before the current epoch. In contrast, for the Hayward scenario, we used as our prior positions the instantaneous position of each observer at the origin time.

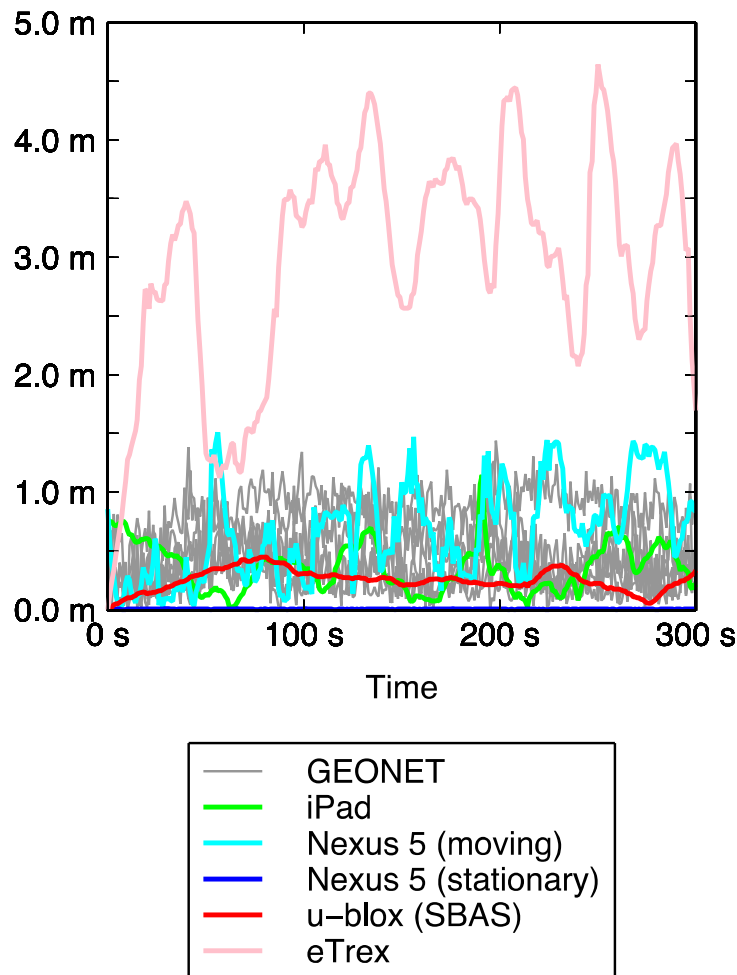

**Figure S1. Background position noise for various GNSS receivers found on consumer devices.**

Although each receiver is stationary, there is always some uncertainty in its computed position. The magnitude of the apparent horizontal displacement is shown for position time series computed using C/A code pseudorange-based positioning for six scientific-grade GEONET GPS stations in Japan, a first-generation iPad, a Nexus 5 smartphone, and u-blox and Garmin eTrex consumer GNSS receivers. The position time series for the GEONET stations were computed using the pr2p program, part of the GIPSY-OASIS software package. All other positions were obtained directly from each receiver according to each one's onboard proprietary processing software. Note that the GNSS receiver in the Nexus 5 smartphone applies a Kalman filter to the output position time series and that the parameters of the filter differ depending on whether the receiver appears to be stationary or in motion. The output position time series for both the stationary and moving cases are shown. (For the moving receiver, positions are relative to actual position of the receiver determined from scientific-grade GNSS.) Also, note that the u-blox time series is phase-smoothed and augmented with satellite-based differential corrections (SBAS) that significantly reduce the noise level of its position estimates relative to the other receivers and processing schemes (with the exception of the heavily-filtered positions output by the Nexus 5 in stationary mode).



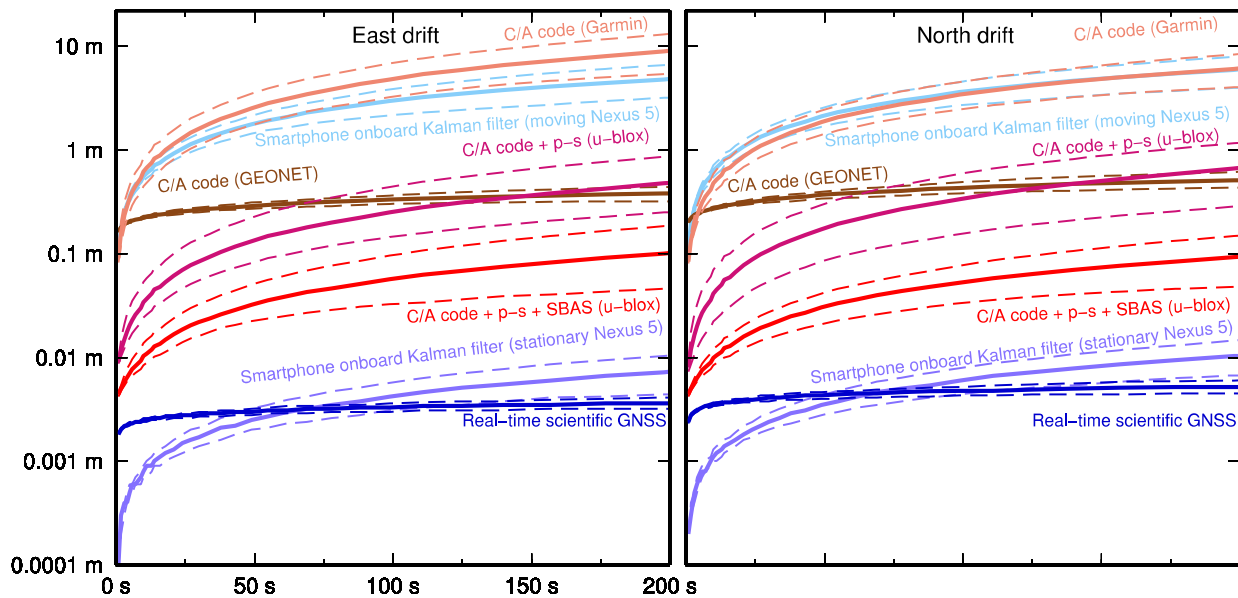

**Figure S2. Spectra of drift of position time series for various GNSS receivers found on consumer devices.** The drift can be characterized by computing the RMS of  $(x(t+\tau)-x(t))$  as a function of various intervals,  $\tau$ , for position time series obtained as in Fig. S1. Initially, the background noise is quantified by computing a power spectral density (PSD) and further refined by characterizing the PSD as a combination of a power-law and white noise processes. Using the parameters obtained for the power-law and white noise, time series data are simulated and the drift is evaluated to obtain a confidence interval. For each set, the solid line is the nominal RMS of the drift while the dashed lines represent the 95% confidence interval determined from 200 simulations.

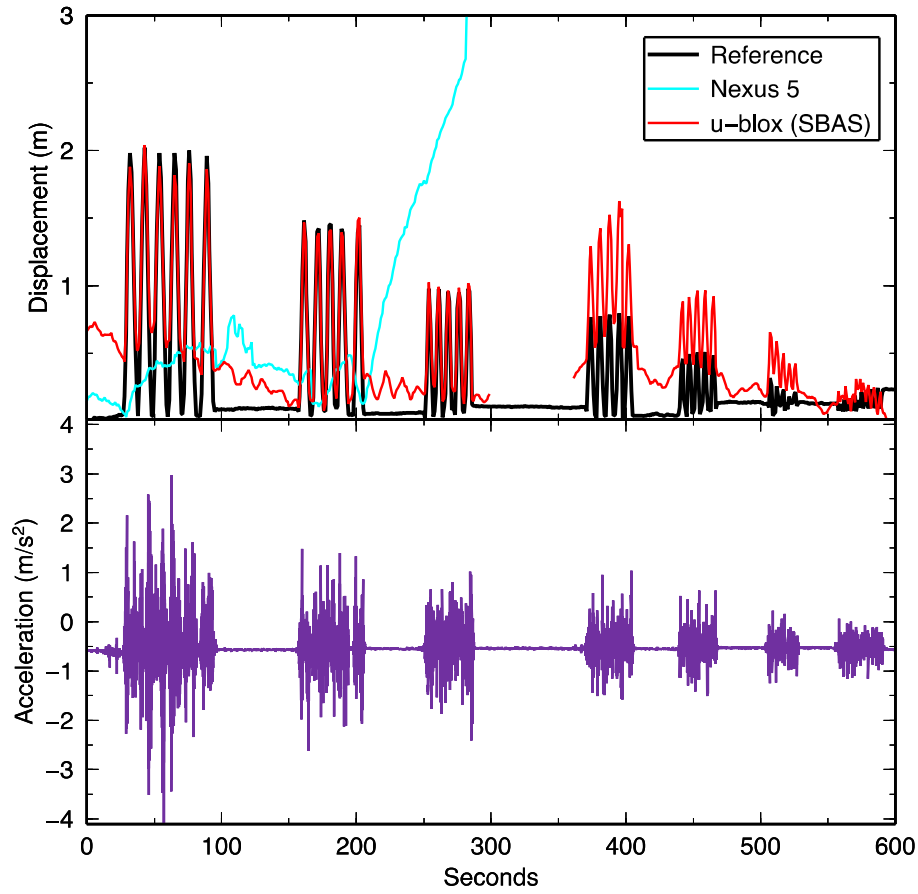

**Figure S3. Observed time series from consumer accelerometers and GNSS receivers.** Shown are the displacement and acceleration time series obtained from Nexus 5 smartphone and u-blox consumer GNSS receiver when they are subjected to the displacement time history shown in black.

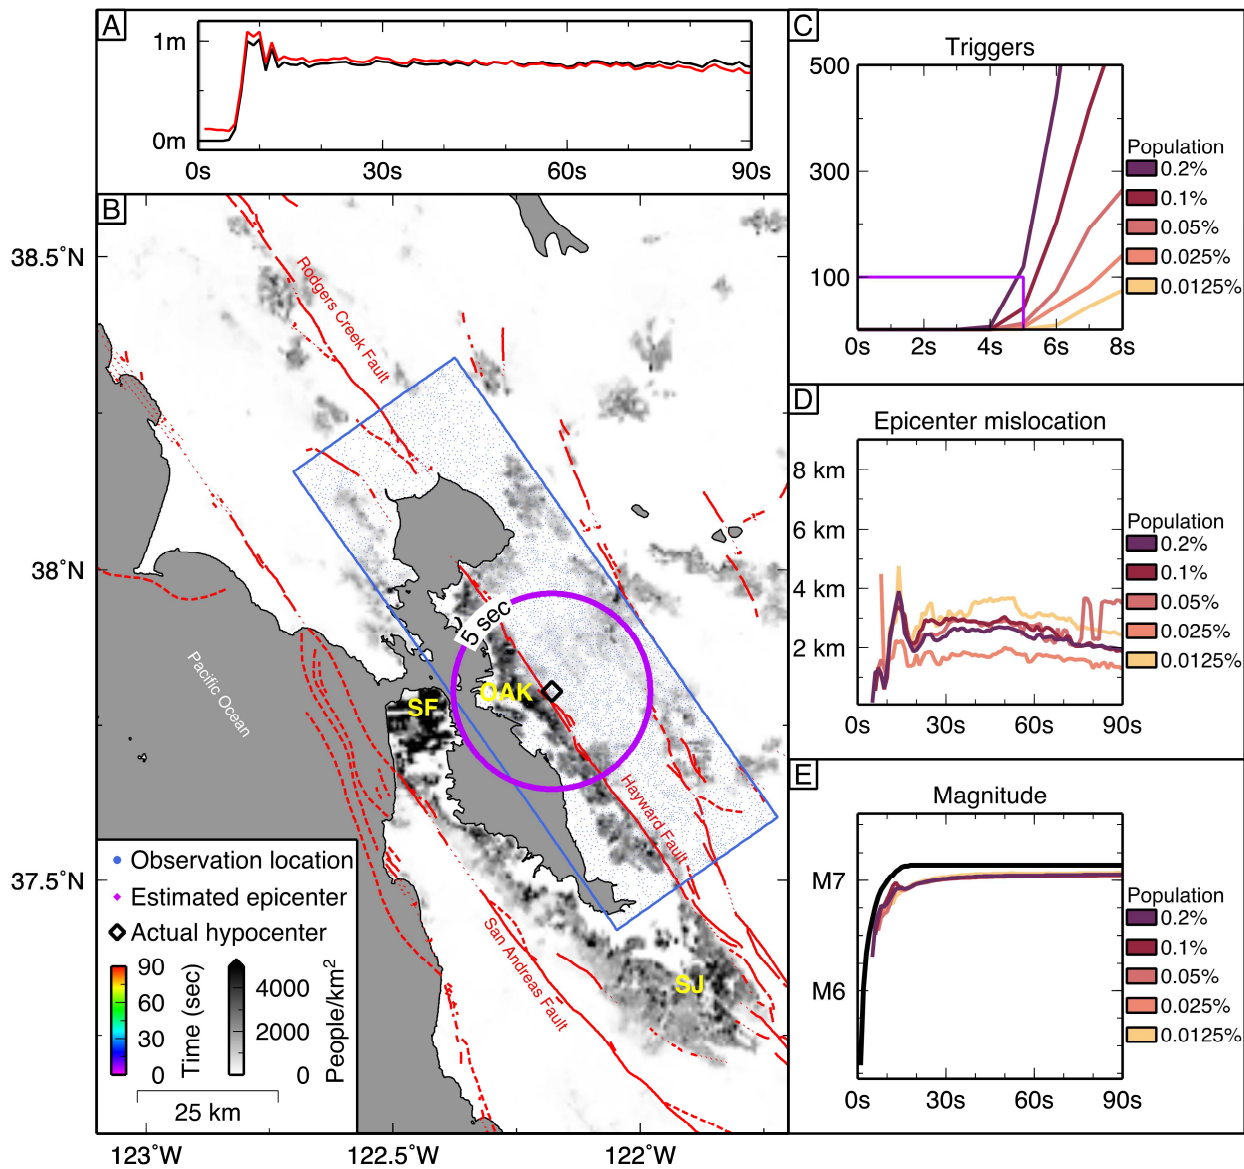

**Figure S4. Hayward fault earthquake scenario.** Same as Fig. 2 in the main text except simulated consumer-quality GNSS data with SBAS differential corrections and phase smoothing is used instead of Kalman filtered simulated smartphone data. (A) Representative displacement time series from Hayward fault rupture scenario. Black line: true displacement. Red line: simulated smartphone GNSS with SBAS and phase smoothing. (B) Diamonds showing estimated epicentral location colored by time after origin. Contour: S-wave position (assuming 3.5 km/s velocity) when detection criterion is satisfied (5 sec). Yellow text denotes major cities: SF=San Francisco, SJ=San Jose, OK=Oakland. Blue dots denote observer locations assuming 0.2% of the population within the blue box contribute data. (C) Number of observers who have detected a potential earthquake trigger, (D) epicenter location error, and (E) estimated moment magnitude release as a function of time for different levels of participation. Black line in (E) is true magnitude release.

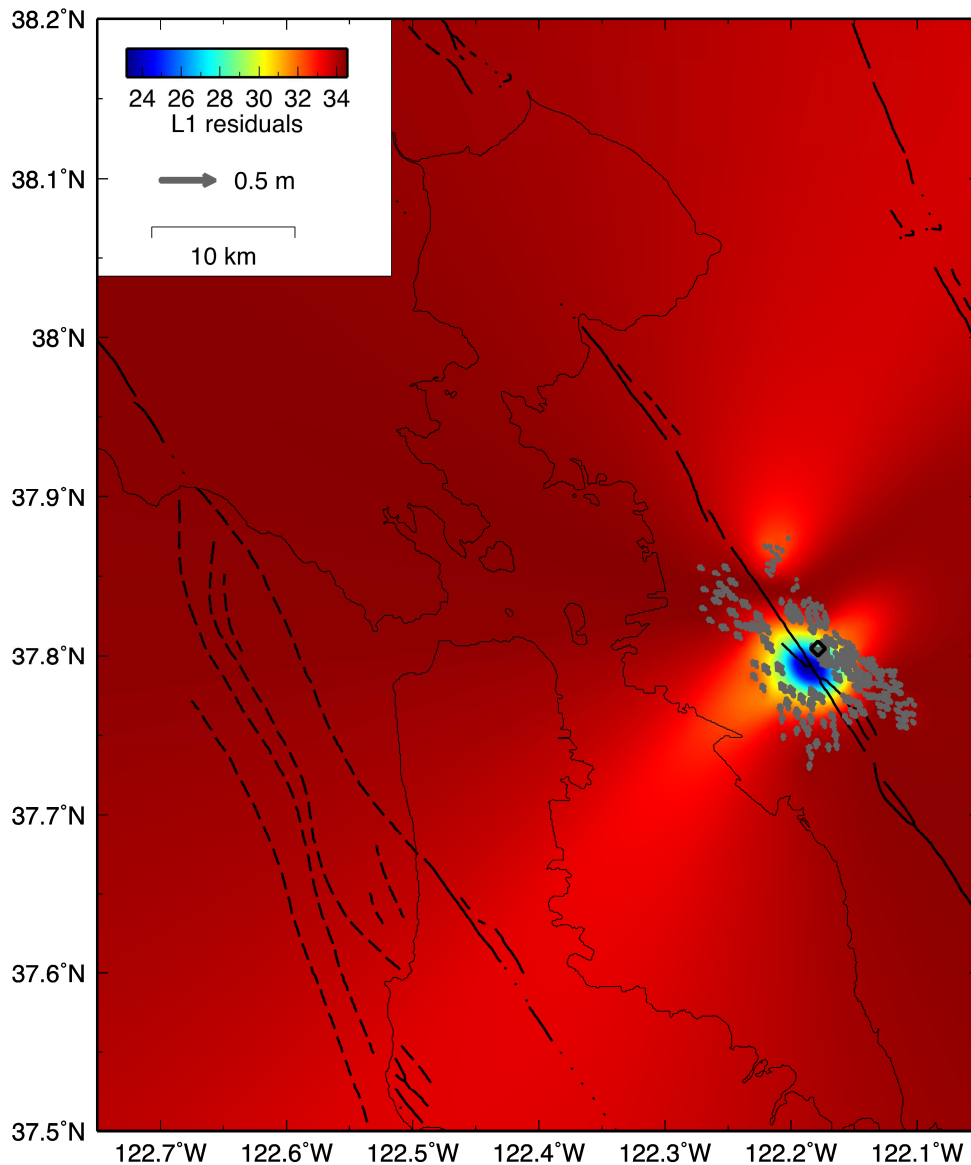

**Figure S5. Epicenter location uncertainty for Hayward fault scenario rupture.** The observed horizontal displacements at triggered stations 5 sec after the origin time are shown with gray arrows. Background color is the sum of L1 residuals between the log of the amplitude of the observed displacements and the amplitude of the predicted displacements from a power law fit. The location with the lowest residual is inferred to be the epicenter. The black diamond marks the true epicenter. The coastline and major faults are shown in black. The power law fit does a good job of recovering the epicenter location.

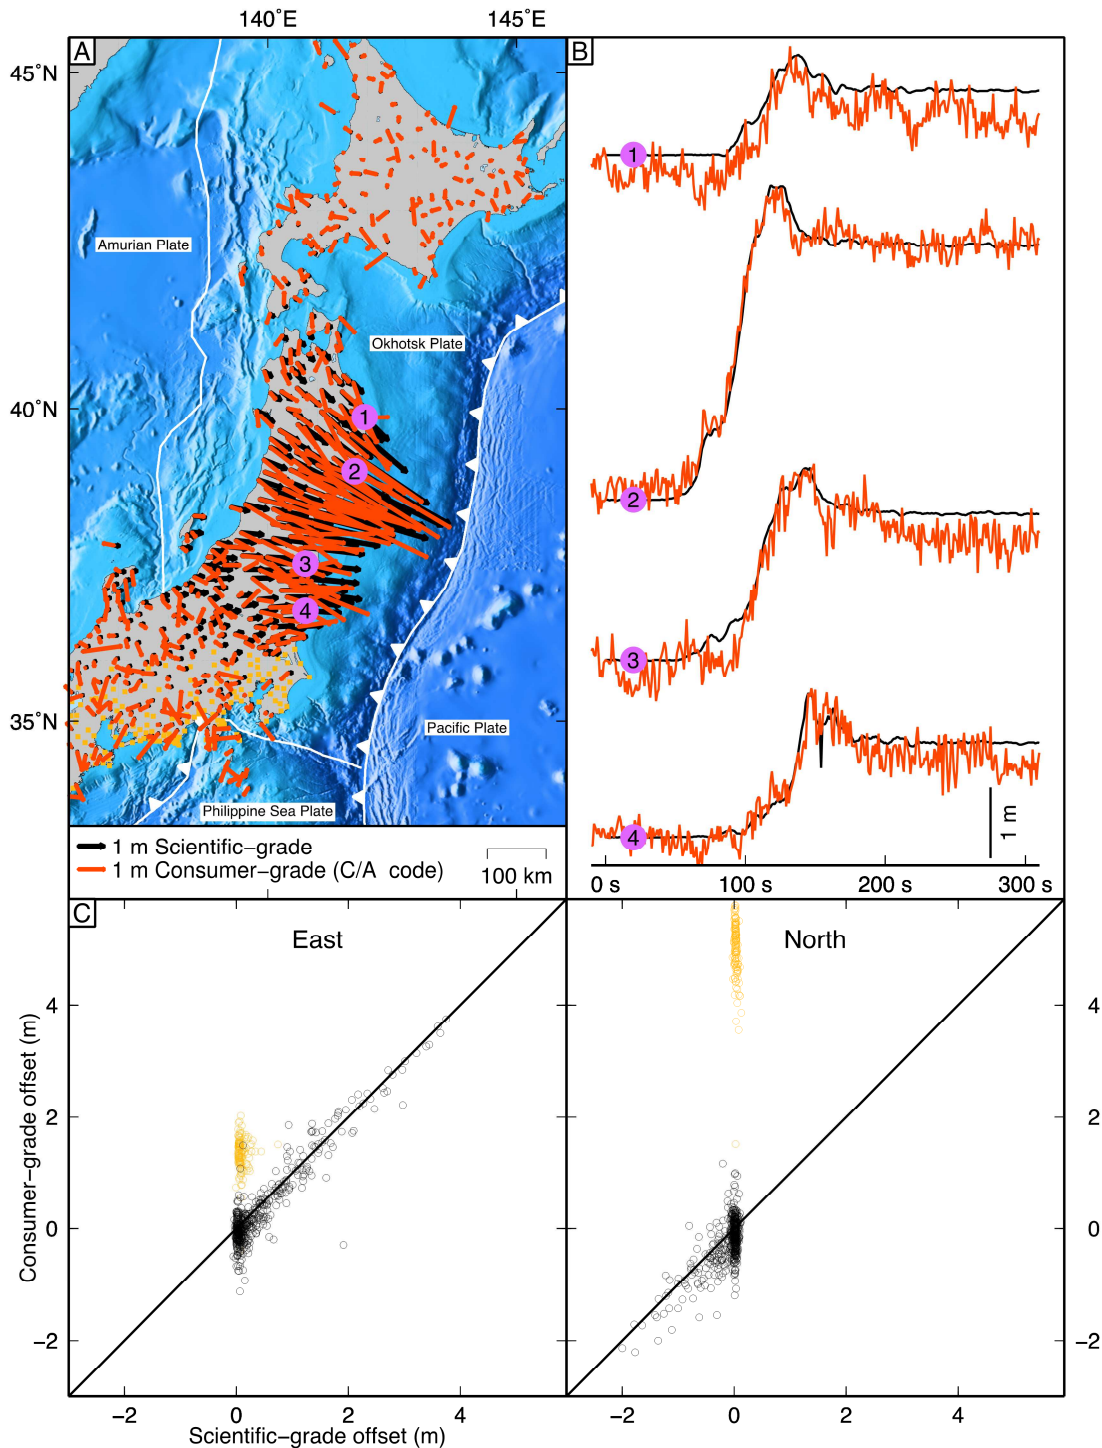

**Figure S6. Tohoku-oki earthquake example.** (A) Observed static displacements from GEONET stations for Tohoku-oki earthquake. Numbered circles mark locations of time series in (B). Black vectors are offsets estimated from post-processed scientific-grade data. Red vectors are offsets estimated from position time series calculated from observed C/A code data, the same type of positioning found in consumer devices. Yellow squares are locations of stations corrupted by atmospheric noise or loss of satellite lock. (B) Observed east-component time series. Black: scientific-grade post-processed data. Red: consumer-grade (C/A code) data. (C) East and north components of static offsets. Yellow circles correspond to corrupted stations in (A).

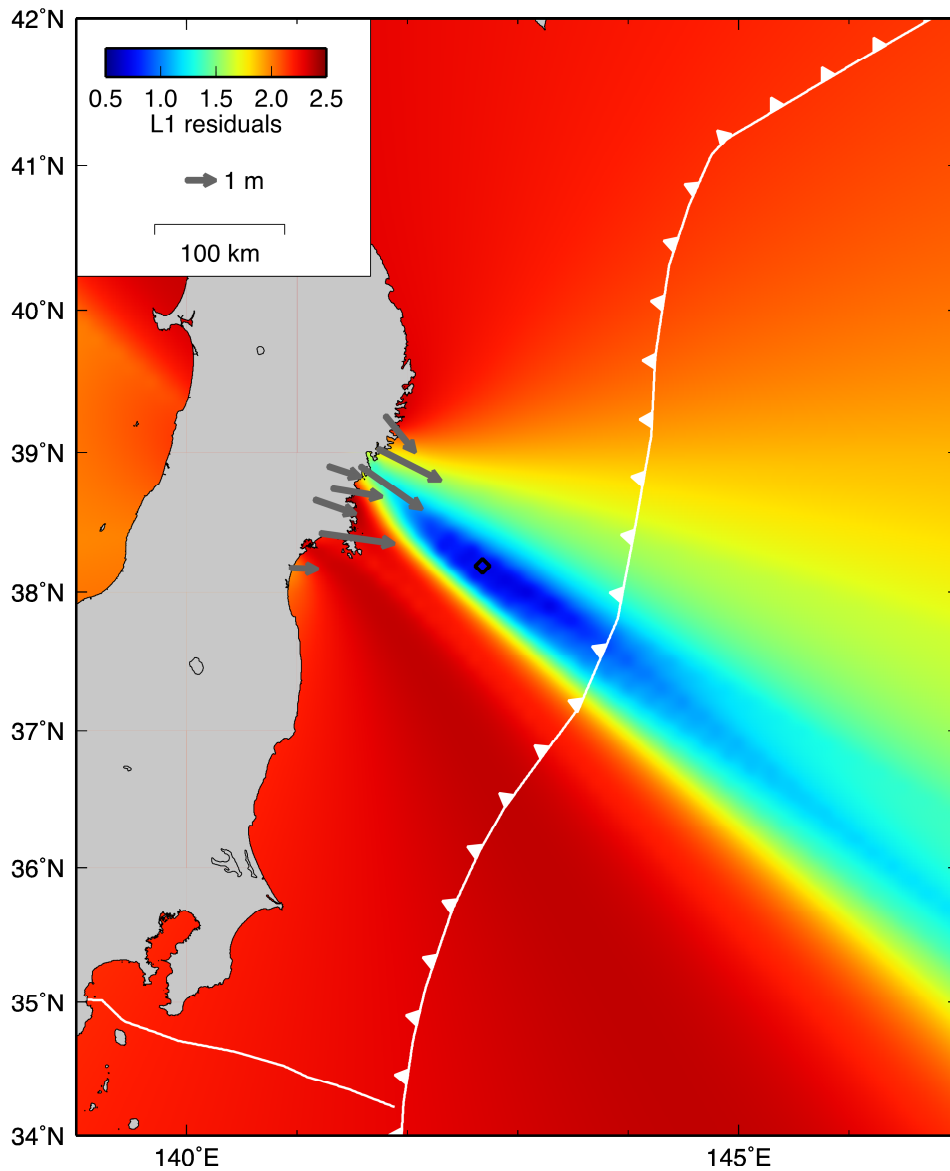

**Figure S7. Epicenter location uncertainty for Tohoku-oki earthquake.** All colors and symbols are the same as in Fig. S4. Gray arrows are horizontal displacements at triggered stations 100 sec after the origin time. Black diamond is the Tohoku-oki earthquake epicenter (29).

| <b>Earthquake</b>     | <b><math>M_w</math></b> | <b>Distance</b> | <b>Station</b> | <b>Component</b> | <b>Description</b>                                                                                                                                                                                                        |
|-----------------------|-------------------------|-----------------|----------------|------------------|---------------------------------------------------------------------------------------------------------------------------------------------------------------------------------------------------------------------------|
| 2011 Tohoku-oki       | 9.0                     | 76 km           | 0550           | East             | Post-processed solution (24)                                                                                                                                                                                              |
| 2010 Maule            | 8.8                     | 70 km           | CONS           | West             | Post-processed solution courtesy of S. E. Owen                                                                                                                                                                            |
| 2003 Tokachi-oki      | 8.3                     | 77 km           | 0015           | East             | Recreation of real-time processing using a network solution with ultra-rapid orbits and a network adjustment made for each epoch (22)                                                                                     |
| 2010 El Mayor-Cucapah | 7.2                     | 70 km           | P494           | South            | Real-time solution from the Southern California Earthquake Center available at: <a href="http://www.data.scec.org/research-tools/MayorCucapah20100404/">http://www.data.scec.org/research-tools/MayorCucapah20100404/</a> |
| 2004 Parkfield        | 6.0                     | 11 km           | HOGS           | North            | Post-processed solution (23)                                                                                                                                                                                              |

**Table S1. Description of observed GPS earthquake displacement time series shown in Fig. 2B.**

| <b>Percent of population</b> | <b>Number of observations</b> | <b>Time to reach 100 triggers</b> |
|------------------------------|-------------------------------|-----------------------------------|
| 0.0125%                      | 294                           | 10 sec                            |
| 0.025%                       | 587                           | 8 sec                             |
| 0.05%                        | 1174                          | 7 sec                             |
| 0.1%                         | 2348                          | 6 sec                             |
| 0.2%                         | 4696                          | 5 sec                             |

**Table S2. Number of data used and detection response times for Hayward fault simulation.**

| Station | Latitude  | Longitude  |
|---------|-----------|------------|
| 0001    | 45.402992 | 141.750435 |
| 0033    | 38.758595 | 140.318736 |
| 0065    | 34.465387 | 136.851128 |
| 0002    | 44.433686 | 143.224179 |
| 0128    | 42.971378 | 141.290333 |
| 0035    | 38.331027 | 140.366086 |
| 0251    | 36.401879 | 136.920558 |
| 0221    | 36.507995 | 138.552713 |
| 0190    | 39.327002 | 140.559778 |
| 0160    | 40.048600 | 141.461945 |
| 0004    | 43.915690 | 144.675842 |
| 0037    | 38.317487 | 140.954184 |
| 0252    | 37.850496 | 136.919268 |
| 0222    | 36.421628 | 139.330387 |
| 0191    | 39.206062 | 139.907717 |
| 0130    | 42.802718 | 140.603519 |
| 0161    | 39.980574 | 141.225065 |
| 0005    | 43.507860 | 144.449008 |
| 0283    | 35.757783 | 136.975302 |
| 0316    | 33.741273 | 136.010900 |
| 0253    | 37.446027 | 137.270049 |
| 0223    | 35.986891 | 139.075685 |
| 0162    | 39.869370 | 141.950542 |
| 0531    | 42.982571 | 144.719147 |
| 0131    | 42.786434 | 140.233203 |
| 0284    | 35.657189 | 137.424773 |
| 0007    | 43.589658 | 142.482479 |
| 0102    | 45.275968 | 141.038213 |
| 0040    | 37.643696 | 139.791506 |
| 0565    | 38.023687 | 138.369882 |
| 0255    | 36.394456 | 136.388942 |
| 0501    | 45.137712 | 141.167097 |
| 0595    | 34.737613 | 139.358585 |
| 0193    | 39.051902 | 140.629588 |
| 0163    | 39.851246 | 141.164861 |
| 0532    | 42.125587 | 143.315695 |
| 0132    | 42.729441 | 141.863983 |
| 0285    | 35.636153 | 136.488768 |
| 0318    | 35.466286 | 136.053666 |
| 0103    | 45.002398 | 142.537089 |
| 0008    | 43.854011 | 141.510373 |
| 0566    | 37.535832 | 138.706939 |
| 0041    | 37.090714 | 140.902515 |
| 0596    | 34.519633 | 139.270932 |



|      |           |            |
|------|-----------|------------|
| 0225 | 35.657206 | 140.048093 |
| 0164 | 39.849176 | 141.803851 |
| 0533 | 41.404706 | 141.447587 |
| 0814 | 34.719474 | 138.876472 |
| 0781 | 44.639926 | 141.793917 |
| 0286 | 35.632897 | 136.611394 |
| 0627 | 36.103635 | 140.086307 |
| 0104 | 44.892461 | 141.741397 |
| 0042 | 36.539928 | 140.611836 |
| 0567 | 37.348539 | 138.516369 |
| 0257 | 36.145619 | 136.278945 |
| 0503 | 44.219722 | 143.615670 |
| 0876 | 43.240529 | 141.345959 |
| 0597 | 34.333121 | 139.210938 |
| 0165 | 39.701092 | 140.964501 |
| 0195 | 38.759721 | 139.957373 |
| 0907 | 39.639369 | 141.426128 |
| 0134 | 42.699268 | 143.103257 |
| 0287 | 35.612086 | 137.174145 |
| 0937 | 37.669288 | 139.972663 |
| 0628 | 34.698904 | 138.939326 |
| 0105 | 44.728496 | 142.265247 |
| 0043 | 36.401847 | 139.726422 |
| 0010 | 42.963261 | 144.431936 |
| 0568 | 37.319871 | 139.020252 |
| 0504 | 44.191942 | 143.076819 |
| 0258 | 35.984908 | 136.504924 |
| 0598 | 34.239914 | 139.137575 |
| 0847 | 35.160451 | 137.868762 |
| 0166 | 39.596572 | 141.172105 |
| 0535 | 41.145546 | 140.821985 |
| 0817 | 35.066974 | 138.209984 |
| 0196 | 38.594037 | 139.831767 |
| 0783 | 44.148753 | 141.664599 |
| 0752 | 36.539259 | 139.056735 |
| 0135 | 42.667876 | 141.074955 |
| 0011 | 43.028625 | 143.459231 |
| 0044 | 36.697027 | 138.906264 |
| 0106 | 44.427048 | 141.330057 |
| 0569 | 37.056681 | 138.242586 |
| 0599 | 34.093764 | 139.561764 |
| 0848 | 45.514114 | 141.955250 |
| 0537 | 40.862361 | 141.131807 |
| 0753 | 36.003735 | 139.269328 |
| 0136 | 42.655530 | 141.602260 |
| 0784 | 43.722779 | 144.506409 |
| 0012 | 42.980515 | 142.401972 |

|      |           |            |
|------|-----------|------------|
| 0939 | 37.461289 | 139.835523 |
| 0107 | 44.294568 | 142.625589 |
| 0169 | 39.338056 | 141.534158 |
| 3031 | 35.415350 | 139.045179 |
| 0570 | 36.950871 | 137.893871 |
| 0506 | 43.908405 | 142.577715 |
| 0260 | 35.792782 | 136.197394 |
| 0600 | 34.075781 | 139.478805 |
| 0819 | 34.902051 | 137.946810 |
| 0849 | 45.230106 | 141.881787 |
| 0198 | 37.963607 | 140.093526 |
| 0879 | 43.171330 | 143.027763 |
| 0910 | 39.235375 | 141.311673 |
| 0538 | 40.706276 | 140.589225 |
| 0170 | 39.253519 | 141.798042 |
| 0137 | 42.646290 | 140.825684 |
| 0785 | 43.624329 | 141.370584 |
| 0631 | 34.984394 | 136.862749 |
| 0046 | 36.499766 | 137.851122 |
| 0940 | 37.444871 | 140.464031 |
| 0971 | 37.432258 | 137.033941 |
| 3065 | 35.610274 | 139.157225 |
| 3001 | 36.295162 | 139.542301 |
| 0230 | 35.268600 | 139.142414 |
| 0507 | 43.828078 | 144.115255 |
| 0601 | 33.884124 | 139.612852 |
| 0171 | 39.023782 | 141.739846 |
| 0820 | 34.849413 | 138.176745 |
| 0199 | 38.197543 | 140.077573 |
| 0850 | 44.990504 | 142.292258 |
| 0788 | 43.101691 | 143.901986 |
| 0138 | 42.551647 | 143.461144 |
| 0172 | 38.902859 | 141.572589 |
| 0109 | 44.019183 | 145.186094 |
| 0941 | 37.326210 | 139.686345 |
| 0972 | 37.226436 | 136.908772 |
| 0014 | 42.983253 | 141.730671 |
| 3066 | 35.428518 | 139.204867 |
| 0231 | 38.465392 | 139.253348 |
| 3002 | 36.263269 | 140.174264 |
| 0508 | 43.738523 | 142.409610 |
| 0572 | 36.736958 | 137.369515 |
| 0602 | 32.463502 | 139.764616 |
| 1158 | 37.000719 | 136.772705 |
| 0821 | 34.752041 | 137.680777 |
| 0851 | 44.916065 | 142.021781 |
| 0881 | 43.149392 | 144.496498 |

|      |           |            |
|------|-----------|------------|
| 0912 | 38.995463 | 141.148523 |
| 0293 | 35.261967 | 137.405606 |
| 0789 | 43.013652 | 142.870059 |
| 0540 | 40.624345 | 140.478527 |
| 0048 | 35.590335 | 138.583298 |
| 0139 | 42.549801 | 141.361481 |
| 0110 | 44.006778 | 142.151690 |
| 3067 | 35.267094 | 139.664837 |
| 0015 | 42.321594 | 143.331004 |
| 0942 | 37.293041 | 140.212745 |
| 0263 | 35.855978 | 138.316396 |
| 0232 | 38.319346 | 138.513087 |
| 0973 | 36.537266 | 136.540675 |
| 3003 | 36.203672 | 139.810527 |
| 1129 | 34.603334 | 136.431937 |
| 0573 | 36.649562 | 137.031898 |
| 0174 | 38.748937 | 140.801635 |
| 0509 | 43.740840 | 141.873847 |
| 0326 | 34.869327 | 136.054828 |
| 0822 | 35.300837 | 136.788824 |
| 0201 | 37.560553 | 140.755075 |
| 0882 | 43.140396 | 141.203293 |
| 0790 | 42.933772 | 142.084600 |
| 0294 | 35.227906 | 136.593445 |
| 0913 | 38.934027 | 140.833189 |
| 0758 | 35.616428 | 139.369897 |
| 0111 | 44.005620 | 143.333701 |
| 3068 | 35.245516 | 139.049338 |
| 0016 | 42.356904 | 142.364605 |
| 0943 | 37.210562 | 140.450970 |
| 0264 | 35.746875 | 138.695131 |
| 0974 | 36.229563 | 136.361645 |
| 0233 | 38.063279 | 138.471681 |
| 0510 | 43.771414 | 142.903019 |
| 0574 | 37.306970 | 137.138544 |
| 0202 | 37.566947 | 140.072680 |
| 0914 | 38.743220 | 141.317863 |
| 0791 | 42.806508 | 143.494972 |
| 0853 | 44.546500 | 142.571168 |
| 0542 | 40.910177 | 140.451565 |
| 0050 | 37.896470 | 138.988865 |
| 0759 | 35.160867 | 139.613842 |
| 0883 | 43.123895 | 143.597702 |
| 0141 | 42.481279 | 142.060223 |
| 0944 | 37.183092 | 140.715997 |
| 0017 | 42.450735 | 139.857668 |
| 3005 | 36.120951 | 139.345170 |

|      |           |            |
|------|-----------|------------|
| 0234 | 37.929383 | 139.351465 |
| 0575 | 37.156744 | 136.718760 |
| 0511 | 43.670502 | 143.578155 |
| 0176 | 38.539480 | 141.147540 |
| 0915 | 38.686135 | 141.004335 |
| 0792 | 42.420548 | 141.081058 |
| 1101 | 35.104762 | 136.503757 |
| 0543 | 39.953080 | 141.066330 |
| 0113 | 43.549398 | 144.986963 |
| 0884 | 43.082596 | 140.811119 |
| 3070 | 35.496589 | 138.814037 |
| 0636 | 34.431442 | 136.628399 |
| 1162 | 38.511196 | 139.533822 |
| 0945 | 37.023581 | 140.376270 |
| 0204 | 37.473462 | 139.528628 |
| 0018 | 42.374215 | 140.942406 |
| 0606 | 35.649518 | 138.690381 |
| 0177 | 38.411756 | 140.851369 |
| 0235 | 37.815902 | 138.273068 |
| 0576 | 37.123156 | 136.996068 |
| 0512 | 43.232105 | 145.258951 |
| 0916 | 38.660630 | 141.160719 |
| 0297 | 34.865589 | 138.922254 |
| 0052 | 36.928958 | 137.487230 |
| 0544 | 39.351300 | 140.769184 |
| 0114 | 43.848897 | 143.787257 |
| 0793 | 42.486411 | 143.151974 |
| 0607 | 35.511868 | 139.025776 |
| 0205 | 37.325468 | 140.662112 |
| 0019 | 42.005856 | 143.156531 |
| 0267 | 36.665155 | 138.247467 |
| 0946 | 36.932620 | 140.690150 |
| 0977 | 35.888217 | 136.339579 |
| 0236 | 37.685906 | 139.477888 |
| 0577 | 36.817478 | 136.755651 |
| 0513 | 43.438836 | 144.079621 |
| 0546 | 39.143088 | 141.575489 |
| 0179 | 38.029659 | 140.843988 |
| 0053 | 37.382375 | 136.889166 |
| 0856 | 44.260854 | 143.364587 |
| 0115 | 43.661823 | 145.131435 |
| 0886 | 42.800343 | 143.655538 |
| 1008 | 34.493872 | 136.173149 |
| 0794 | 41.934853 | 140.371234 |
| 0638 | 35.420357 | 136.264746 |
| 0144 | 42.130936 | 142.935389 |
| 0608 | 36.239029 | 137.984550 |

|      |           |            |
|------|-----------|------------|
| 0020 | 42.153546 | 139.519600 |
| 0947 | 36.475850 | 140.385691 |
| 0547 | 39.596124 | 141.675287 |
| 0268 | 36.386176 | 138.322523 |
| 0578 | 36.370069 | 136.605333 |
| 0180 | 37.989930 | 140.442574 |
| 0514 | 43.336265 | 142.395347 |
| 0237 | 37.667523 | 138.780505 |
| 0054 | 36.663412 | 136.649940 |
| 0299 | 35.190106 | 136.828832 |
| 0548 | 38.546216 | 140.847874 |
| 0116 | 43.408688 | 144.774327 |
| 0857 | 44.165474 | 142.400900 |
| 0795 | 39.849017 | 141.452591 |
| 3073 | 35.289461 | 138.445699 |
| 0887 | 42.803340 | 142.953686 |
| 0609 | 36.228369 | 137.871750 |
| 0021 | 42.008075 | 140.107324 |
| 0269 | 36.346013 | 138.637796 |
| 0579 | 35.968887 | 136.184992 |
| 0181 | 40.325047 | 140.577349 |
| 0515 | 43.307009 | 144.597660 |
| 0238 | 37.662295 | 139.059120 |
| 0549 | 38.425057 | 141.212910 |
| 0300 | 35.138752 | 137.253563 |
| 0919 | 38.177119 | 140.943689 |
| 0055 | 36.231172 | 136.172974 |
| 0117 | 43.404680 | 141.431175 |
| 0364 | 34.567032 | 136.050386 |
| 3074 | 35.200979 | 138.253514 |
| 0796 | 39.127008 | 140.988456 |
| 0858 | 44.114449 | 142.601247 |
| 0888 | 42.685336 | 140.011777 |
| 0022 | 41.826073 | 140.747826 |
| 0980 | 35.753871 | 138.949989 |
| 0270 | 36.322371 | 137.902815 |
| 0580 | 35.836841 | 136.055983 |
| 0949 | 36.872247 | 139.505314 |
| 0516 | 43.248411 | 141.890933 |
| 0182 | 40.271156 | 140.263661 |
| 0239 | 37.467718 | 138.998010 |
| 0920 | 37.824600 | 140.727664 |
| 0797 | 37.984407 | 140.645637 |
| 0301 | 35.039465 | 137.313164 |
| 1106 | 34.297927 | 136.388492 |
| 0118 | 43.382527 | 145.114961 |
| 0210 | 37.126294 | 140.259928 |

|      |           |            |
|------|-----------|------------|
| 0147 | 42.042968 | 140.805541 |
| 0859 | 44.065033 | 144.993504 |
| 0023 | 41.466377 | 140.040652 |
| 0889 | 42.673963 | 143.312796 |
| 0271 | 36.208467 | 138.216485 |
| 0981 | 35.467692 | 138.606868 |
| 0611 | 36.084663 | 137.682627 |
| 0551 | 39.891134 | 139.848935 |
| 0517 | 43.209509 | 140.860617 |
| 0183 | 40.215440 | 140.787335 |
| 0950 | 36.537633 | 139.752790 |
| 0240 | 37.311315 | 138.789982 |
| 0799 | 38.434342 | 140.094631 |
| 1107 | 33.932948 | 136.139969 |
| 3044 | 35.111861 | 140.079268 |
| 0860 | 44.052106 | 141.860750 |
| 0272 | 36.130639 | 138.460973 |
| 0149 | 41.599025 | 140.315890 |
| 0024 | 41.300772 | 141.213275 |
| 0890 | 42.554262 | 142.395924 |
| 0582 | 36.300705 | 139.987766 |
| 0612 | 36.026163 | 138.214484 |
| 0184 | 40.247295 | 140.048679 |
| 0241 | 37.231122 | 138.333571 |
| 0800 | 37.018449 | 140.841646 |
| 0120 | 43.292584 | 140.597072 |
| 0212 | 36.862093 | 140.413270 |
| 0185 | 40.006878 | 140.401988 |
| 0273 | 36.121109 | 137.983011 |
| 0983 | 36.706647 | 138.096727 |
| 0150 | 41.455298 | 140.880506 |
| 0026 | 40.778984 | 140.272982 |
| 0861 | 43.909926 | 143.534157 |
| 0553 | 39.702681 | 140.732849 |
| 0583 | 36.114813 | 139.931499 |
| 0519 | 43.195165 | 145.520496 |
| 0059 | 35.800483 | 137.248373 |
| 0801 | 37.036934 | 139.402233 |
| 0952 | 36.837355 | 139.060852 |
| 0242 | 37.166035 | 138.933720 |
| 0121 | 43.289471 | 143.562424 |
| 0213 | 36.650567 | 140.293423 |
| 0274 | 35.783618 | 137.696260 |
| 0027 | 40.133449 | 141.789096 |
| 0554 | 39.199096 | 140.506691 |
| 0520 | 43.077589 | 141.540116 |
| 0151 | 41.043221 | 140.635892 |

|      |           |            |
|------|-----------|------------|
| 0802 | 36.778061 | 138.944817 |
| 3047 | 34.954084 | 139.864078 |
| 0243 | 37.160790 | 138.100191 |
| 0954 | 36.591377 | 138.847891 |
| 0924 | 39.921391 | 140.535855 |
| 0028 | 39.572385 | 141.939962 |
| 0122 | 43.232934 | 144.325031 |
| 0214 | 36.800309 | 140.753912 |
| 0275 | 35.556130 | 138.038317 |
| 3079 | 35.103911 | 138.134901 |
| 0187 | 39.749162 | 140.597045 |
| 0615 | 35.726293 | 137.983889 |
| 0555 | 39.015972 | 139.927495 |
| 0863 | 43.878722 | 143.176695 |
| 0521 | 42.938860 | 143.170567 |
| 0893 | 41.711325 | 140.535026 |
| 0152 | 40.968244 | 141.367963 |
| 0803 | 38.288982 | 140.199916 |
| 0244 | 37.079132 | 138.608723 |
| 0029 | 39.110624 | 141.203919 |
| 3015 | 35.803329 | 140.407007 |
| 0955 | 36.395346 | 139.016710 |
| 0123 | 43.231993 | 143.298020 |
| 0215 | 36.364912 | 140.077947 |
| 0925 | 39.527565 | 140.053927 |
| 1174 | 40.575183 | 140.294993 |
| 0188 | 39.658309 | 140.234213 |
| 0586 | 36.979581 | 139.805748 |
| 0616 | 35.343734 | 137.676399 |
| 0556 | 38.496769 | 140.365152 |
| 0864 | 43.794028 | 145.056862 |
| 0986 | 35.944601 | 137.785436 |
| 0804 | 35.419268 | 139.521923 |
| 0153 | 40.625070 | 141.197831 |
| 0522 | 42.884431 | 141.577417 |
| 0245 | 37.045173 | 137.873847 |
| 3049 | 34.916115 | 138.924823 |
| 0030 | 39.967903 | 139.776150 |
| 0277 | 35.317144 | 137.925272 |
| 0216 | 36.344369 | 140.476333 |
| 0124 | 43.120607 | 144.126529 |
| 0189 | 39.549292 | 140.386625 |
| 1175 | 40.921155 | 140.990227 |
| 0587 | 36.776371 | 139.854257 |
| 0063 | 35.128109 | 137.041285 |
| 0557 | 38.148096 | 140.271138 |
| 0805 | 37.828158 | 139.226038 |

|      |           |            |
|------|-----------|------------|
| 0154 | 40.577642 | 139.928117 |
| 0523 | 42.773190 | 141.407093 |
| 0246 | 36.993459 | 138.830845 |
| 0031 | 39.398697 | 140.048241 |
| 0278 | 35.246999 | 137.587668 |
| 0217 | 36.854234 | 140.039256 |
| 1144 | 34.970567 | 138.794657 |
| 3085 | 34.776075 | 138.786062 |
| 0125 | 43.057595 | 144.843024 |
| 1176 | 37.336698 | 140.808446 |
| 0618 | 36.285642 | 137.363020 |
| 0559 | 37.615952 | 140.205652 |
| 0988 | 35.815553 | 137.450879 |
| 0155 | 40.523654 | 140.578148 |
| 0806 | 37.776990 | 138.880441 |
| 0866 | 43.710323 | 143.381084 |
| 0525 | 42.551380 | 140.767623 |
| 0896 | 41.160934 | 141.385693 |
| 0247 | 36.865404 | 138.198674 |
| 0279 | 36.335510 | 137.147172 |
| 0032 | 38.894603 | 139.808852 |
| 0218 | 36.665983 | 139.619247 |
| 0126 | 43.056828 | 140.499172 |
| 1145 | 38.901934 | 141.283192 |
| 3019 | 35.710371 | 139.488263 |
| 0619 | 35.911634 | 137.200668 |
| 0156 | 40.515359 | 141.511282 |
| 0526 | 42.473902 | 140.876372 |
| 0897 | 41.121723 | 140.293529 |
| 0807 | 37.498656 | 138.779540 |
| 0280 | 36.033048 | 136.952763 |
| 0219 | 36.598946 | 139.923466 |
| 0311 | 34.547047 | 136.550657 |
| 3088 | 34.939797 | 138.074862 |
| 0127 | 42.985252 | 140.543938 |
| 0959 | 35.143803 | 139.968470 |
| 0620 | 34.855033 | 138.776523 |
| 0929 | 39.054380 | 140.447334 |
| 0590 | 36.542216 | 140.179308 |
| 0561 | 37.424507 | 140.135877 |
| 0157 | 40.291075 | 141.076475 |
| 0527 | 42.060505 | 139.446149 |
| 0249 | 36.634336 | 137.195197 |
| 0868 | 43.644561 | 143.991734 |
| 0220 | 36.769692 | 139.224904 |
| 0281 | 35.973458 | 137.534867 |
| 3053 | 34.751349 | 138.989815 |



|      |           |            |
|------|-----------|------------|
| 0312 | 34.433140 | 136.334258 |
| 0991 | 35.723488 | 136.784620 |
| 0930 | 38.938103 | 140.183474 |
| 0591 | 36.616317 | 138.591445 |
| 0158 | 40.405200 | 141.713135 |
| 0250 | 36.578705 | 137.439896 |
| 0810 | 37.589737 | 138.920278 |
| 0528 | 42.123143 | 140.666868 |
| 0869 | 43.555994 | 145.220367 |
| 3090 | 34.941345 | 137.817940 |
| 0961 | 37.540342 | 139.111448 |
| 0842 | 34.954346 | 138.249899 |
| 0992 | 35.523129 | 137.309093 |
| 0564 | 38.056183 | 139.461685 |
| 0592 | 36.234670 | 139.066641 |
| 0901 | 40.508759 | 141.331994 |
| 0529 | 41.976687 | 140.715436 |
| 0870 | 43.545927 | 144.719044 |
| 2005 | 43.528644 | 141.844819 |
| 0871 | 43.521577 | 142.187612 |
| 1150 | 42.557933 | 140.898795 |
| 0594 | 34.761544 | 139.434017 |
| 0844 | 40.834407 | 140.810538 |
| 0933 | 38.628414 | 140.220506 |
| 0778 | 45.219767 | 141.598230 |
| 0813 | 35.114167 | 138.973867 |
| 0903 | 40.271043 | 141.484864 |
| 3059 | 34.121068 | 139.503849 |
| 3093 | 34.715251 | 138.053542 |
| 0964 | 37.107085 | 138.457359 |
| 0934 | 38.170440 | 140.393881 |
| 0845 | 37.361823 | 140.324390 |
| 0779 | 45.126774 | 142.351840 |
| 3060 | 34.059111 | 139.547153 |
| 0873 | 43.473581 | 143.753855 |
| 0965 | 36.778956 | 140.296488 |
| 0996 | 34.917341 | 137.152388 |
| 0905 | 39.970955 | 141.662180 |
| 0935 | 37.920585 | 139.879406 |
| 0966 | 36.919508 | 137.026432 |
| 0967 | 36.864344 | 137.551326 |
| 3097 | 34.792836 | 137.791792 |

**Table S3. Locations of GEONET GPS stations used in analysis of Tohoku-oki earthquake.**
